# Supplementary material
Source: publisher figshare collection journal article supplement (https://tandf.figshare.com/ndownloader/files/21519936)
Supplement: Supplementary file 1 [file 21519936]

**Supplementary Information**

**Genetic diversity of *Procambarus clarkii* populations based on mitochondrial DNA and microsatellite markers in different areas of Guangxi, China**

Yizhi Zhonga,b, Zhangsheng Tanga, Liming Huanga, Dapeng Wanga,*, Zhuanling Lua,*

a*Guangxi Academy of Fishery Sciences/Guangxi Key Laboratory of Aquatic Genetic Breeding and Healthy Aquaculture, Nanning Guangxi* *5300021, China*

b*Guangxi Nanning Yanleshang Biotechnology Co. LTD, Nanning Guangxi 530004, China*

Supplementary Table S1 The primers information of microsatellite detection

| Locus | Primer sequence (5’-3’) | Product size (bp) | Repeat motif |
| --- | --- | --- | --- |
| PclG-02 | F: CTCCCCATGCACTCTGGCTCTGT | 216-224 | (GATA)3GAGAA(GATA)5 |
| R:TGGCGAATTTTGCCTGTTTCTGTC |
| PclG-04 | F: TATATCAGTCAATCTGTCCAG | 170-290 | (TCTA)3 … (TCTA)2 … (TCTA)29 … (TCTA)2 |
| R: TCAGTAAGTAGATTGATAGAAGG |
| PclG-07 | F: CCTCCCACCAGGGTTATCTATTCA | 100-160 | (TCTA)8 |
| R: GTGGGTGTGGCGCTCTTGTT |
| PclG-08 | F: ACGATAAATGGATAGATGGATGAA | 148-220 | (GATA)16 |
| R: CCGGGTCTGTCTGTCTGTCA |
| PclG-10 | F: TGCTCACGCAAACTTGTATTCAGT | 90-176 | (TAGA)2TA(TAGA)16 |
| R: CAATGGTCCTTGATTTGGTGTTCT |
| PclG-17 | F: GTCGGGAACCTATTTACAGTGTAT | 156-190 | (TCTA)14 |
| R: AAGAGCGAAGAAAGAGATAAAGAT |
| PclG-28 | F: CTCGGCGAGTTTACTGAAAT | 210-270 | (GATA)22(GA)5 |
| R: AGAAGAAAGGGATATAAGGTAAAG |
| PclG-29 | F: GAAAGTCATGGGTGTAGGTGTAAC | 95-165 | (TATC)9 |
| R: TTTTTGGGCTATGTGACGAG |

Supplementary S2 Hardy-Weinberg equilibrium analysis for each locus based on microsatellite

| Populations Locus | NN | DT | RS | LZ | LB |
| --- | --- | --- | --- | --- | --- |
| PclG02 | 0.3572* | -0.0340** | -0.1791** | -0.0378** | 0.0191** |
| PclG04 | -0.4234 | -0.7421** | -0.7934** | -0.8898** | -0.9293** |
| PclG07 | -0.0863** | 0.0033** | -0.2836* | -0.1939** | -0.8010** |
| PclG08 | 0.8385** | 0.5000** | 0.1645 | 0.8998** | 0.7619** |
| PclG10 | -1.0000** | -0.8796** | -1.000** | -0.7074** | -0.9142** |
| PclG17 | 0.3806 | -0.5136** | -0.1357* | -0.0745** | -0.5067** |
| PclG28 | -0.4467** | -0.4456* | -0.1208* | -0.0601 | -0.1469** |
| PclG29 | 0.1273 | -0.0119 | -0.3731** | -0.1383 | -0.5897** |

Note: Statistics by Chi-square test for Hardy-Weinberg equilibrium. *: significant deviation, *p* < 0.05; **: extremely significant deviation, *p* < 0.01.


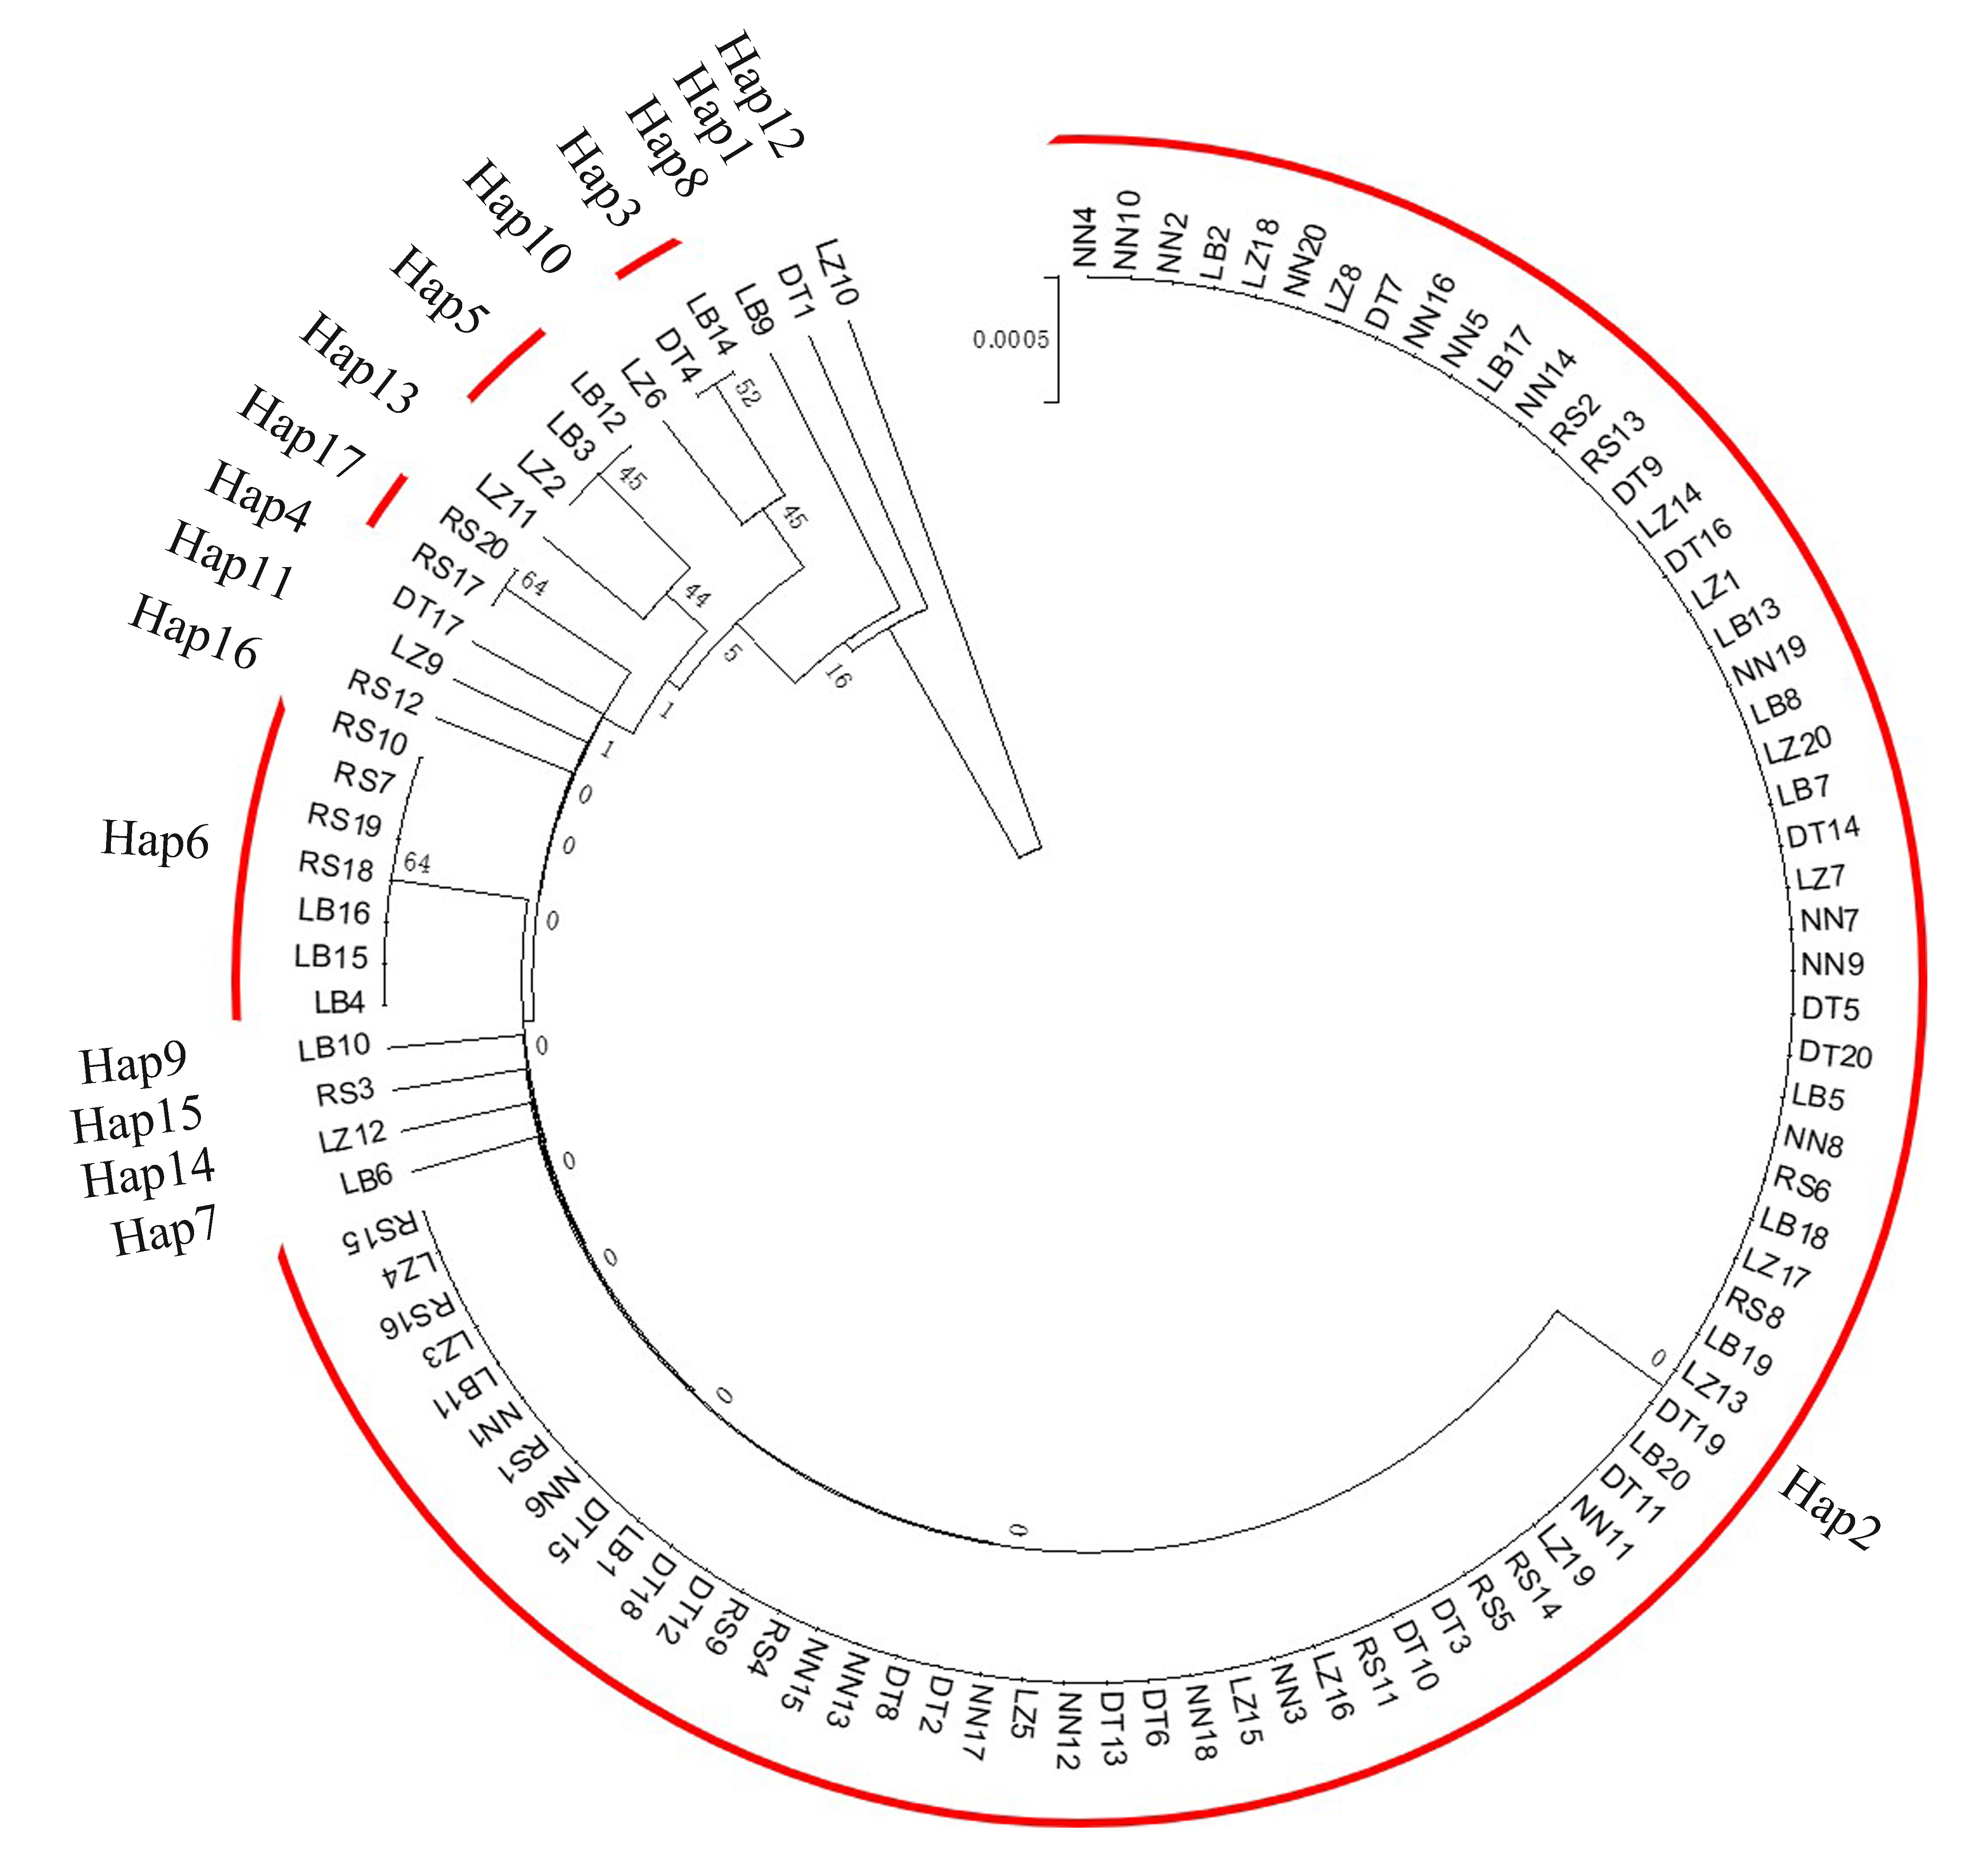


Supplementary Figure S1 The UPGMA tree of 100 individuals based on *CytB* sequences.
